# Supplementary material for: Estimated Effectiveness of COVID-19 Vaccines Against Omicron or Delta Symptomatic Infection and Severe Outcomes
Source: PubMed Central journal article supplement (PMC9500552; doi:10.1001/jamanetworkopen.2022.32760), 2022-09-22
Supplement: jamanetwopen-e2232760-s001.pdf [file jamanetwopen-e2232760-s001.pdf]

## Supplementary Online Content

Buchan SA, Chung H, Brown KA, et al. Estimated effectiveness of COVID-19 vaccines against Omicron or Delta symptomatic infection and severe outcomes. *JAMA Netw Open*. 2022;5(9):e2232760. doi:10.1001/jamanetworkopen.2022.32760

**eFigure.** Flow Diagram

**eTable 1.** Descriptive Characteristics of Participants Tested for SARS-CoV-2 With COVID-19–Relevant Symptoms During the Period December 6 to 26, 2021, Comparing Vaccinated and Unvaccinated Participants, Delta Cases and SARS-CoV-2–Negative Controls Only

**eTable 2.** Parameter Estimates From Adjusted Models for Primary Analysis of Vaccine Effectiveness Against Omicron and Delta Symptomatic Infection

**eTable 3.** Parameter Estimates From Adjusted Models for Primary Analysis Of Vaccine Effectiveness Against Omicron and Delta Severe Outcomes

**eTable 4.** Number of Omicron and Delta Severe Outcomes (Hospitalization or Death) by Laboratory Testing Categorization During the Period December 6 to 26, 2021

**eTable 5.** Estimates of Vaccine Effectiveness Against Severe Outcomes (Hospitalization or Death) During the Period December 6 to 26, 2021, Using the Less Specific Definition of Omicron and Delta

This supplementary material has been provided by the authors to give readers additional information about their work.

eFigure. Flow diagram

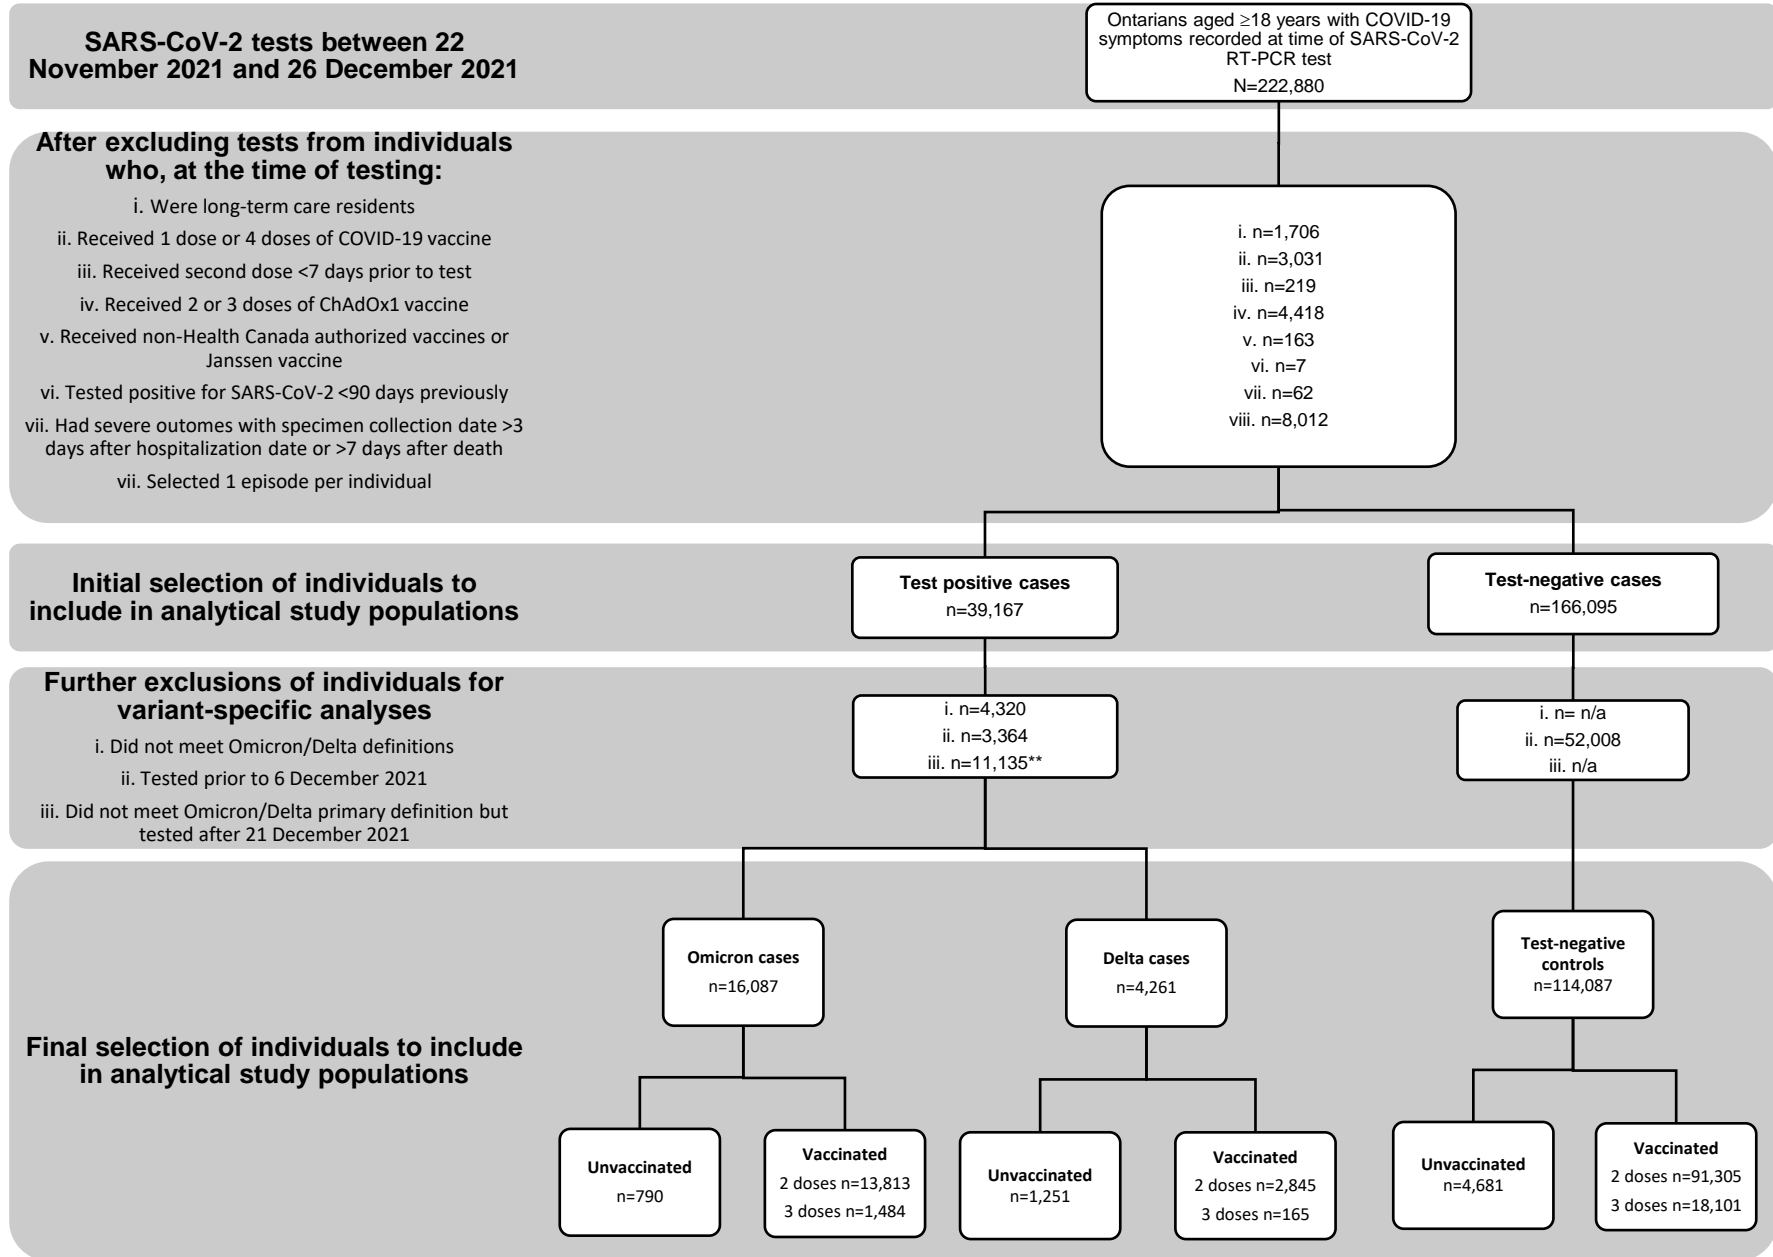

\*\*Individuals were excluded from primary analysis but were included in sensitivity analysis with less specific outcome definition.

**eTable 1.** Descriptive characteristics of participants tested for SARS-CoV-2 with COVID-19–relevant symptoms during the period December 6 to 26, 2021, comparing vaccinated and unvaccinated participants, Delta cases and SARS-CoV-2–negative controls only

|                                                                 | Unvaccinated,<br>n (%) <sup>a</sup> | 2 doses,<br>n (%) <sup>a</sup> | SD <sup>b</sup> | 3 doses,<br>n (%) <sup>a</sup> | SD <sup>b</sup> |
|-----------------------------------------------------------------|-------------------------------------|--------------------------------|-----------------|--------------------------------|-----------------|
| <b>Total</b>                                                    | N=5,932                             | N=94,150                       |                 | N=18,266                       |                 |
| Subject characteristics                                         |                                     |                                |                 |                                |                 |
| Age (years), mean (standard deviation)                          | 38.9 ± 15.8                         | 40.2 ± 15.3                    | 0.09            | 52.6 ± 18.8                    | 0.79            |
| Age group (years)                                               |                                     |                                |                 |                                |                 |
| 18–29                                                           | 2,016 (34.0%)                       | 27,376 (29.1%)                 | 0.11            | 2,515 (13.8%)                  | 0.49            |
| 30–39                                                           | 1,637 (27.6%)                       | 24,615 (26.1%)                 | 0.03            | 3,076 (16.8%)                  | 0.26            |
| 40–49                                                           | 902 (15.2%)                         | 16,612 (17.6%)                 | 0.07            | 2,344 (12.8%)                  | 0.07            |
| 50–59                                                           | 645 (10.9%)                         | 13,457 (14.3%)                 | 0.10            | 3,272 (17.9%)                  | 0.20            |
| 60–69                                                           | 423 (7.1%)                          | 8,188 (8.7%)                   | 0.06            | 2,948 (16.1%)                  | 0.28            |
| 70–79                                                           | 199 (3.4%)                          | 2,738 (2.9%)                   | 0.03            | 2,718 (14.9%)                  | 0.41            |
| ≥80                                                             | 110 (1.9%)                          | 1,164 (1.2%)                   | 0.05            | 1,393 (7.6%)                   | 0.27            |
| Male sex                                                        | 2,825 (47.6%)                       | 39,011 (41.4%)                 | 0.12            | 6,429 (35.2%)                  | 0.25            |
| Any comorbidity <sup>c</sup>                                    | 2,396 (40.4%)                       | 38,250 (40.6%)                 | 0               | 10,453 (57.2%)                 | 0.34            |
| Number of SARS-CoV-2 tests within 3 months prior to 14 Dec 2020 |                                     |                                |                 |                                |                 |
| 0                                                               | 4,847 (81.7%)                       | 69,875 (74.2%)                 | 0.18            | 12,208 (66.8%)                 | 0.35            |
| 1                                                               | 825 (13.9%)                         | 17,984 (19.1%)                 | 0.14            | 3,666 (20.1%)                  | 0.16            |
| ≥2                                                              | 260 (4.4%)                          | 6,291 (6.7%)                   | 0.10            | 2,392 (13.1%)                  | 0.31            |
| Receipt of 2019-2020 and/or 2020-2021 influenza vaccination     | 455 (7.7%)                          | 30,775 (32.7%)                 | 0.66            | 10,420 (57.0%)                 | 1.24            |
| Public health unit region <sup>d</sup>                          |                                     |                                |                 |                                |                 |
| Central East                                                    | 616 (10.4%)                         | 7,487 (8.0%)                   | 0.08            | 1,409 (7.7%)                   | 0.09            |
| Central West                                                    | 1,123 (18.9%)                       | 17,822 (18.9%)                 | 0               | 3,110 (17.0%)                  | 0.05            |
| Durham                                                          | 299 (5.0%)                          | 6,573 (7.0%)                   | 0.08            | 1,009 (5.5%)                   | 0.02            |
| Eastern                                                         | 325 (5.5%)                          | 5,707 (6.1%)                   | 0.02            | 1,234 (6.8%)                   | 0.05            |
| North                                                           | 568 (9.6%)                          | 5,768 (6.1%)                   | 0.13            | 1,495 (8.2%)                   | 0.05            |
| Ottawa                                                          | 153 (2.6%)                          | 4,635 (4.9%)                   | 0.12            | 1,027 (5.6%)                   | 0.15            |
| Peel                                                            | 649 (10.9%)                         | 10,922 (11.6%)                 | 0.02            | 1,547 (8.5%)                   | 0.08            |
| South West                                                      | 1,035 (17.4%)                       | 10,304 (10.9%)                 | 0.19            | 2,363 (12.9%)                  | 0.13            |
| Toronto                                                         | 858 (14.5%)                         | 17,617 (18.7%)                 | 0.11            | 3,799 (20.8%)                  | 0.17            |
| York                                                            | 267 (4.5%)                          | 6,941 (7.4%)                   | 0.12            | 1,206 (6.6%)                   | 0.09            |
| Household income quintile <sup>d, e</sup>                       |                                     |                                |                 |                                |                 |
| 1 (lowest)                                                      | 1,418 (23.9%)                       | 14,532 (15.4%)                 | 0.21            | 2,441 (13.4%)                  | 0.27            |
| 2                                                               | 1,295 (21.8%)                       | 17,245 (18.3%)                 | 0.09            | 3,027 (16.6%)                  | 0.13            |
| 3                                                               | 1,179 (19.9%)                       | 18,816 (20.0%)                 | 0               | 3,361 (18.4%)                  | 0.04            |
| 4                                                               | 1,071 (18.1%)                       | 20,620 (21.9%)                 | 0.10            | 4,076 (22.3%)                  | 0.11            |
| 5 (highest)                                                     | 922 (15.5%)                         | 22,528 (23.9%)                 | 0.21            | 5,270 (28.9%)                  | 0.32            |
| Essential workers quintile <sup>d, f</sup>                      |                                     |                                |                 |                                |                 |
| 1 (0%–32.5%)                                                    |                                     |                                |                 |                                |                 |
| 2 (32.5%–42.3%)                                                 | 732 (12.3%)                         | 21,601 (22.9%)                 | 0.28            | 5,211 (28.5%)                  | 0.41            |
| 3 (42.3%–49.8%)                                                 | 1,042 (17.6%)                       | 23,401 (24.9%)                 | 0.18            | 4,573 (25.0%)                  | 0.18            |
| 4 (50.0%–57.5%)                                                 | 1,245 (21.0%)                       | 18,893 (20.1%)                 | 0.02            | 3,502 (19.2%)                  | 0.05            |
| 5 (57.5%–100%)                                                  | 1,365 (23.0%)                       | 16,254 (17.3%)                 | 0.14            | 2,829 (15.5%)                  | 0.19            |
| Persons per dwelling quintile <sup>d, g</sup>                   |                                     |                                |                 |                                |                 |
| 1 (0–2.1)                                                       | 1,120 (18.9%)                       | 17,004 (18.1%)                 | 0.02            | 3,770 (20.6%)                  | 0.04            |
| 2 (2.2–2.4)                                                     | 1,261 (21.3%)                       | 15,453 (16.4%)                 | 0.12            | 3,192 (17.5%)                  | 0.10            |
| 3 (2.5–2.6)                                                     | 833 (14.0%)                         | 12,429 (13.2%)                 | 0.02            | 2,512 (13.8%)                  | 0.01            |
| 4 (2.7–3.0)                                                     | 1,424 (24.0%)                       | 23,016 (24.4%)                 | 0.01            | 4,439 (24.3%)                  | 0.01            |
| 5 (3.1–5.7)                                                     | 1,210 (20.4%)                       | 25,632 (27.2%)                 | 0.16            | 4,206 (23.0%)                  | 0.06            |

|                                                                    | Unvaccinated,<br>n (%) <sup>a</sup> | 2 doses,<br>n (%) <sup>a</sup> | SD <sup>b</sup> | 3 doses,<br>n (%) <sup>a</sup> | SD <sup>b</sup> |
|--------------------------------------------------------------------|-------------------------------------|--------------------------------|-----------------|--------------------------------|-----------------|
| Self-identified visible minority quintile <sup>d, h</sup>          |                                     |                                |                 |                                |                 |
| 1 (0.0%–2.2%)                                                      | 1,225 (20.7%)                       | 13,526 (14.4%)                 | 0.17            | 2,958 (16.2%)                  | 0.12            |
| 2 (2.2%–7.5%)                                                      | 1,186 (20.0%)                       | 16,549 (17.6%)                 | 0.06            | 3,441 (18.8%)                  | 0.03            |
| 3 (7.5%–18.7%)                                                     | 1,052 (17.7%)                       | 18,445 (19.6%)                 | 0.05            | 3,921 (21.5%)                  | 0.09            |
| 4 (18.7%–43.5%)                                                    | 1,139 (19.2%)                       | 21,562 (22.9%)                 | 0.09            | 4,157 (22.8%)                  | 0.09            |
| 5 (43.5%–100%)                                                     | 1,251 (21.1%)                       | 23,495 (25.0%)                 | 0.09            | 3,645 (20.0%)                  | 0.03            |
| Week of test                                                       |                                     |                                |                 |                                |                 |
| 6 Dec 2021 to 12 Dec 2021                                          | 1,999 (33.7%)                       | 27,997 (29.7%)                 | 0.09            | 2,551 (14.0%)                  | 0.48            |
| 13 Dec 2021 to 19 Dec 2021                                         | 2,152 (36.3%)                       | 35,471 (37.7%)                 | 0.03            | 5,297 (29.0%)                  | 0.16            |
| 20 Dec 2021 to 26 Dec 2021                                         | 1,781 (30.0%)                       | 30,682 (32.6%)                 | 0.06            | 10,418 (57.0%)                 | 0.57            |
| Prior positive SARS-CoV-2 test                                     | 253 (4.3%)                          | 3,568 (3.8%)                   | 0.02            | 446 (2.4%)                     | 0.10            |
| COVID-19 vaccine characteristics                                   |                                     |                                |                 |                                |                 |
| Unvaccinated                                                       | 5,932 (100%)                        | n/a                            |                 | n/a                            |                 |
| Received 2-dose primary series only (with at least 1 mRNA vaccine) | n/a                                 | 94,150 (100%)                  |                 | n/a                            |                 |
| Received BNT162b2 for third dose                                   | n/a                                 | n/a                            |                 | 14,916 (81.7%)                 |                 |
| Received mRNA-1273 for third dose                                  | n/a                                 | n/a                            |                 | 3,350 (18.3%)                  |                 |
| Time since second dose                                             |                                     |                                |                 |                                |                 |
| 7-59 days                                                          | n/a                                 | 2,315 (2.5%)                   |                 | n/a                            |                 |
| 60-119 days                                                        | n/a                                 | 6,954 (7.4%)                   |                 | n/a                            |                 |
| 120-179 days                                                       | n/a                                 | 62,577 (66.5%)                 |                 | n/a                            |                 |
| 180-239 days                                                       | n/a                                 | 20,509 (21.8%)                 |                 | n/a                            |                 |
| ≥240 days                                                          | n/a                                 | 1,795 (1.9%)                   |                 | n/a                            |                 |
| Time since third dose                                              |                                     |                                |                 |                                |                 |
| 0-6 days                                                           | n/a                                 | n/a                            |                 | 6,037 (33.1%)                  |                 |
| 7-59 days                                                          | n/a                                 | n/a                            |                 | 11,357 (62.2%)                 |                 |
| ≥60 days                                                           | n/a                                 | n/a                            |                 | 872 (4.8%)                     |                 |
| Interval between first and second doses                            |                                     |                                |                 |                                |                 |
| 15-34 days                                                         | n/a                                 | 12,675 (13.5%)                 |                 | 3,224 (17.7%)                  |                 |
| 35-55 days                                                         | n/a                                 | 34,995 (37.2%)                 |                 | 3,965 (21.7%)                  |                 |
| ≥56 days                                                           | n/a                                 | 46,480 (49.4%)                 |                 | 11,077 (60.6%)                 |                 |
| Interval between second and third doses                            |                                     |                                |                 |                                |                 |
| ≤111 days                                                          | n/a                                 | n/a                            |                 | 240 (1.3%)                     |                 |
| 112-167 days                                                       | n/a                                 | n/a                            |                 | 1,643 (9.0%)                   |                 |
| ≥168 days                                                          | n/a                                 | n/a                            |                 | 16,383 (89.7%)                 |                 |

<sup>a</sup>Proportion reported, unless stated otherwise.

<sup>b</sup>SD=standardized difference. Standardized differences of >0.10 are considered clinically relevant. Comparison of subjects who have received 2 doses with unvaccinated subjects, and subjects who have received 3 doses with unvaccinated subjects.

<sup>c</sup>Comorbidities include chronic respiratory diseases, chronic heart diseases, hypertension, diabetes, immunocompromising conditions due to underlying diseases or therapy, autoimmune diseases, chronic kidney disease, advanced liver disease, dementia/frailty and history of stroke or transient ischemic attack.

<sup>d</sup>The sum of counts does not equal the column total because of individuals with missing information (<1.0%) for this characteristic.

<sup>e</sup>Household income quintile has variable cut-off values in each city/Census area to account for cost of living. A dissemination area (DA) being in quintile 1 means it is among the lowest 20% of DAs in its city by income.

<sup>f</sup>Percentage of people in the area working in the following occupations: sales and service occupations; trades, transport and equipment operators and related occupations; natural resources, agriculture, and related production occupations; and occupations in manufacturing and utilities. Census counts for people are randomly rounded up or down to the nearest number divisible by 5, which causes some minor imprecision.

<sup>g</sup>Range of persons per dwelling.

<sup>h</sup>Percentage of people in the area who self-identified as a visible minority. Census counts for people are randomly rounded up or down to the nearest number divisible by 5, which causes some minor imprecision.

**eTable 2.** Parameter estimates from adjusted models for primary analysis of vaccine effectiveness against Omicron and Delta symptomatic infection

| Variable                                                        | Omicron  |                |         | Delta    |                |         |
|-----------------------------------------------------------------|----------|----------------|---------|----------|----------------|---------|
|                                                                 | Estimate | Standard Error | P value | Estimate | Standard Error | P value |
| <b>Intercept</b>                                                | -3.6226  | 0.0848         | <.0001  | -1.7072  | 0.1143         | <.0001  |
| Time since vaccination                                          |          |                |         |          |                |         |
| Unvaccinated (reference)                                        |          |                |         |          |                |         |
| Dose 2: 7-59 days                                               | -0.4408  | 0.0830         | <.0001  | -2.2211  | 0.1344         | <.0001  |
| Dose 2: 60-119 days                                             | -0.1319  | 0.0543         | 0.0151  | -2.1776  | 0.0818         | <.0001  |
| Dose 2: 120-179 days                                            | -0.1631  | 0.0430         | 0.0001  | -2.0946  | 0.0423         | <.0001  |
| Dose 2: 180-239 days                                            | -0.0135  | 0.0457         | 0.7670  | -1.9028  | 0.0547         | <.0001  |
| Dose 2: 240+ days                                               | -0.0157  | 0.0869         | 0.8569  | -1.5862  | 0.1254         | <.0001  |
| Dose 3: 0-6 days                                                | -0.4495  | 0.0577         | <.0001  | -2.8520  | 0.1247         | <.0001  |
| Dose 3: 7+ days                                                 | -0.9424  | 0.0592         | <.0001  | -3.5120  | 0.1146         | <.0001  |
| Age group (years)                                               |          |                |         |          |                |         |
| 18-29 (reference)                                               |          |                |         |          |                |         |
| 30-39                                                           | -0.5331  | 0.0236         | <.0001  | 0.1310   | 0.0483         | 0.0066  |
| 40-49                                                           | -0.3523  | 0.0255         | <.0001  | 0.4621   | 0.0500         | <.0001  |
| 50-59                                                           | -0.5821  | 0.0294         | <.0001  | 0.4591   | 0.0540         | <.0001  |
| 60-69                                                           | -1.0087  | 0.0434         | <.0001  | 0.5161   | 0.0633         | <.0001  |
| 70-79                                                           | -1.1549  | 0.0723         | <.0001  | 0.9654   | 0.0798         | <.0001  |
| ≥80                                                             | -1.0877  | 0.1034         | <.0001  | 0.8224   | 0.1129         | <.0001  |
| Sex                                                             |          |                |         |          |                |         |
| Female (reference)                                              |          |                |         |          |                |         |
| Male                                                            | 0.3061   | 0.0179         | <.0001  | 0.2135   | 0.0326         | <.0001  |
| Any comorbidity                                                 |          |                |         |          |                |         |
| No (reference)                                                  |          |                |         |          |                |         |
| Yes                                                             | -0.0224  | 0.0192         | 0.2425  | -0.0250  | 0.0352         | 0.4780  |
| Number of SARS-CoV-2 tests within 3 months prior to 14 Dec 2020 |          |                |         |          |                |         |
| 0 (reference)                                                   |          |                |         |          |                |         |
| 1                                                               | -0.1415  | 0.0235         | <.0001  | -0.2009  | 0.0459         | <.0001  |
| ≥2                                                              | -0.2328  | 0.0396         | <.0001  | -0.4646  | 0.0823         | <.0001  |
| Receipt of 2019-2020 and/or 2020-2021 influenza vaccination     |          |                |         |          |                |         |
| No (reference)                                                  |          |                |         |          |                |         |
| Yes                                                             | -0.2830  | 0.0212         | <.0001  | -0.2533  | 0.0404         | <.0001  |
| Public health unit region <sup>d</sup>                          |          |                |         |          |                |         |
| Central East (reference)                                        |          |                |         |          |                |         |
| Central West                                                    | 0.4825   | 0.0431         | <.0001  | 0.1260   | 0.0675         | 0.0619  |
| Durham                                                          | 0.2134   | 0.0530         | <.0001  | -0.3432  | 0.0957         | 0.0003  |
| Eastern                                                         | 0.3576   | 0.0537         | <.0001  | 0.0688   | 0.0869         | 0.4286  |
| North                                                           | -0.9319  | 0.0746         | <.0001  | 0.0401   | 0.0837         | 0.6320  |
| Ottawa                                                          | 0.3550   | 0.0564         | <.0001  | -0.3813  | 0.1235         | 0.0020  |
| Peel                                                            | 0.5569   | 0.0496         | <.0001  | 0.1460   | 0.0844         | 0.0837  |
| South West                                                      | -0.1947  | 0.0510         | 0.0001  | 0.4872   | 0.0678         | <.0001  |
| Toronto                                                         | 0.2390   | 0.0488         | <.0001  | -0.0742  | 0.0836         | 0.3751  |
| York                                                            | 0.3391   | 0.0524         | <.0001  | 0.0124   | 0.0923         | 0.8932  |
| Missing                                                         | 0.1608   | 0.4436         | 0.7170  | 0.2255   | 0.6790         | 0.7399  |
| Household income quintile <sup>d, e</sup>                       |          |                |         |          |                |         |
| 1 (lowest) (reference)                                          |          |                |         |          |                |         |
| 2                                                               | 0.0439   | 0.0351         | 0.2104  | -0.1313  | 0.0562         | 0.0195  |
| 3                                                               | 0.0864   | 0.0370         | 0.0197  | -0.1167  | 0.0612         | 0.0565  |
| 4                                                               | 0.1680   | 0.0395         | <.0001  | -0.1259  | 0.0665         | 0.0583  |

| Variable                                                  | Omicron  |                |         | Delta    |                |         |
|-----------------------------------------------------------|----------|----------------|---------|----------|----------------|---------|
|                                                           | Estimate | Standard Error | P value | Estimate | Standard Error | P value |
| 5 (highest)                                               | 0.2615   | 0.0435         | <.0001  | -0.1584  | 0.0747         | 0.0340  |
| Missing                                                   | 0.1623   | 0.4734         | 0.7316  | -0.5845  | 0.6863         | 0.3944  |
| Essential workers quintile <sup>d, f</sup>                |          |                |         |          |                |         |
| 1 (0%–32.5%) (reference)                                  |          |                |         |          |                |         |
| 2 (32.5%–42.3%)                                           | 0.00986  | 0.0267         | 0.7124  | 0.1593   | 0.0567         | 0.0049  |
| 3 (42.3%–49.8%)                                           | -0.0490  | 0.0312         | 0.1169  | 0.1745   | 0.0614         | 0.0045  |
| 4 (50.0%–57.5%)                                           | -0.1047  | 0.0358         | 0.0034  | 0.1333   | 0.0667         | 0.0457  |
| 5 (57.5%–100%)                                            | -0.1727  | 0.0418         | <.0001  | 0.2469   | 0.0721         | 0.0006  |
| Missing                                                   | -6.2477  | 56.0660        | 0.9113  | 1.6525   | 1.3362         | 0.2162  |
| Persons per dwelling quintile <sup>d, g</sup>             |          |                |         |          |                |         |
| 1 (0–2.1) (reference)                                     |          |                |         |          |                |         |
| 2 (2.2–2.4)                                               | -0.0817  | 0.0346         | 0.0182  | 0.00880  | 0.0581         | 0.8796  |
| 3 (2.5–2.6)                                               | 0.0110   | 0.0363         | 0.7623  | 0.1052   | 0.0642         | 0.1015  |
| 4 (2.7–3.0)                                               | 0.0318   | 0.0327         | 0.3304  | 0.1778   | 0.0602         | 0.0031  |
| 5 (3.1–5.7)                                               | 0.0297   | 0.0365         | 0.4154  | 0.4267   | 0.0676         | <.0001  |
| Missing                                                   | 0.4196   | 0.2895         | 0.1473  | 1.0095   | 0.5976         | 0.0912  |
| Self-identified visible minority quintile <sup>d, h</sup> |          |                |         |          |                |         |
| 1 (0.0%–2.2%) (reference)                                 |          |                |         |          |                |         |
| 2 (2.2%–7.5%)                                             | 0.0693   | 0.0377         | 0.0661  | 0.0452   | 0.0536         | 0.3991  |
| 3 (7.5%–18.7%)                                            | 0.1801   | 0.0380         | <.0001  | 0.0124   | 0.0582         | 0.8318  |
| 4 (18.7%–43.5%)                                           | 0.1513   | 0.0403         | 0.0002  | -0.1672  | 0.0652         | 0.0103  |
| 5 (43.5%–100%)                                            | 0.1568   | 0.0459         | 0.0006  | -0.1859  | 0.0781         | 0.0174  |
| Missing                                                   | 6.1356   | 56.0657        | 0.9129  | -2.2019  | 1.2285         | 0.0731  |
| Week of test                                              |          |                |         |          |                |         |
| 6 Dec 2021 to 12 Dec 2021 (ref.)                          |          |                |         |          |                |         |
| 13 Dec 2021 to 19 Dec 2021                                | 1.6316   | 0.0407         | <.0001  | 0.0346   | 0.0376         | 0.3578  |
| 20 Dec 2021 to 26 Dec 2021                                | 2.3534   | 0.0397         | <.0001  | -0.5167  | 0.0442         | <.0001  |
| Prior positive SARS-CoV-2 test                            |          |                |         |          |                |         |
| No (reference)                                            |          |                |         |          |                |         |
| Yes                                                       | -1.7665  | 0.0955         | <.0001  | -2.8357  | 0.3181         | <.0001  |

**eTable 3.** Parameter estimates from adjusted models for primary analysis of vaccine effectiveness against Omicron and Delta severe outcomes

| Variable                                                        | Omicron  |                |         | Delta    |                |         |
|-----------------------------------------------------------------|----------|----------------|---------|----------|----------------|---------|
|                                                                 | Estimate | Standard Error | P value | Estimate | Standard Error | P value |
| <b>Intercept</b>                                                | -11.5695 | 1.0753         | <.0001  | -5.7068  | 0.5282         | <.0001  |
| Time since vaccination                                          |          |                |         |          |                |         |
| Unvaccinated (reference)                                        |          |                |         |          |                |         |
| Dose 2: 7-59 days                                               | -0.8040  | 0.7789         | 0.3020  | -2.8132  | 0.5113         | <.0001  |
| Dose 2: 60-119 days                                             | -0.4599  | 0.5079         | 0.3652  | -3.8438  | 0.5090         | <.0001  |
| Dose 2: 120-179 days                                            | -1.3830  | 0.3462         | <.0001  | -4.3172  | 0.1927         | <.0001  |
| Dose 2: 180-239 days                                            | -1.7125  | 0.3819         | <.0001  | -3.5588  | 0.2140         | <.0001  |
| Dose 2: 240+ days                                               | -1.9924  | 1.0734         | 0.0634  | -3.0673  | 0.5952         | <.0001  |
| Dose 3: 0-6 days                                                | -2.3892  | 0.5941         | <.0001  | -4.3575  | 0.4308         | <.0001  |
| Dose 3: 7+ days                                                 | -2.9231  | 0.4437         | <.0001  | -4.5961  | 0.2893         | <.0001  |
| Age group (years)                                               |          |                |         |          |                |         |
| 18-29 (reference)                                               |          |                |         |          |                |         |
| 30-39                                                           | 0.4033   | 0.6071         | 0.5065  | 0.8848   | 0.4349         | 0.0419  |
| 40-49                                                           | 0.5590   | 0.6348         | 0.3786  | 2.0973   | 0.3984         | <.0001  |
| 50-59                                                           | 1.3463   | 0.5559         | 0.0154  | 2.8208   | 0.3872         | <.0001  |
| 60-69                                                           | 1.1019   | 0.6486         | 0.0893  | 3.5825   | 0.3836         | <.0001  |
| 70-79                                                           | 3.5778   | 0.5283         | <.0001  | 4.2324   | 0.3920         | <.0001  |
| ≥80                                                             | 4.6432   | 0.5234         | <.0001  | 4.6536   | 0.4047         | <.0001  |
| Sex                                                             |          |                |         |          |                |         |
| Female (reference)                                              |          |                |         |          |                |         |
| Male                                                            | 0.3641   | 0.2183         | 0.0953  | 0.5035   | 0.1261         | <.0001  |
| Any comorbidity                                                 |          |                |         |          |                |         |
| No (reference)                                                  |          |                |         |          |                |         |
| Yes                                                             | 1.4566   | 0.3868         | 0.0002  | 0.6030   | 0.1595         | 0.0002  |
| Number of SARS-CoV-2 tests within 3 months prior to 14 Dec 2020 |          |                |         |          |                |         |
| 0 (reference)                                                   |          |                |         |          |                |         |
| 1                                                               | -0.0218  | 0.3326         | 0.9478  | -0.1350  | 0.1984         | 0.4960  |
| ≥2                                                              | 0.4492   | 0.4171         | 0.2815  | -0.5364  | 0.3400         | 0.1146  |
| Receipt of 2019-2020 and/or 2020-2021 influenza vaccination     |          |                |         |          |                |         |
| No (reference)                                                  |          |                |         |          |                |         |
| Yes                                                             | -0.1780  | 0.2486         | 0.4740  | -0.00616 | 0.1613         | 0.9695  |
| Public health unit region <sup>d</sup>                          |          |                |         |          |                |         |
| Central East (reference)                                        |          |                |         |          |                |         |
| Central West                                                    | 0.6680   | 0.5685         | 0.2400  | -0.0175  | 0.2466         | 0.9433  |
| Durham                                                          | -0.0543  | 0.8000         | 0.9459  | -0.7117  | 0.4417         | 0.1071  |
| Eastern                                                         | 0.3904   | 0.7202         | 0.5878  | 0.6469   | 0.2799         | 0.0208  |
| North                                                           | -1.6170  | 1.1296         | 0.1523  | -0.3383  | 0.2970         | 0.2547  |
| Ottawa                                                          | 1.1131   | 0.7191         | 0.1217  | -0.2877  | 0.4965         | 0.5623  |
| Peel                                                            | 0.0426   | 0.6667         | 0.9490  | -0.7776  | 0.3758         | 0.0385  |
| South West                                                      | -0.8306  | 0.6875         | 0.2270  | 0.1568   | 0.2418         | 0.5168  |
| Toronto                                                         | 0.6847   | 0.6309         | 0.2777  | -0.1216  | 0.3212         | 0.7051  |
| York                                                            | 0.00305  | 0.7723         | 0.9968  | 0.0188   | 0.3721         | 0.9596  |
| Missing                                                         | 8.0708   | 150.5          | 0.9572  | 10.8880  | 452.1          | 0.9808  |
| Household income quintile <sup>d, e</sup>                       |          |                |         |          |                |         |
| 1 (lowest) (reference)                                          |          |                |         |          |                |         |
| 2                                                               | -0.3680  | 0.3766         | 0.3286  | -0.0102  | 0.1862         | 0.9562  |
| 3                                                               | 0.2571   | 0.4055         | 0.5260  | -0.3370  | 0.2267         | 0.1372  |
| 4                                                               | 0.4584   | 0.4489         | 0.3072  | -0.2797  | 0.2442         | 0.2521  |



| Variable                                                  | Omicron  |                |         | Delta    |                |         |
|-----------------------------------------------------------|----------|----------------|---------|----------|----------------|---------|
|                                                           | Estimate | Standard Error | P value | Estimate | Standard Error | P value |
| 5 (highest)                                               | 0.4341   | 0.5243         | 0.4077  | -0.7971  | 0.2910         | 0.0062  |
| Missing                                                   | 1.1156   | 171.4          | 0.9948  | 6.9457   | 999.8          | 0.9945  |
| Essential workers quintile <sup>d, f</sup>                |          |                |         |          |                |         |
| 1 (0%–32.5%) (reference)                                  |          |                |         |          |                |         |
| 2 (32.5%–42.3%)                                           | 0.2322   | 0.3910         | 0.5525  | -0.0479  | 0.2425         | 0.8433  |
| 3 (42.3%–49.8%)                                           | 0.6456   | 0.4109         | 0.1162  | 0.2036   | 0.2428         | 0.4018  |
| 4 (50.0%–57.5%)                                           | 0.8278   | 0.4478         | 0.0645  | -0.1680  | 0.2631         | 0.5231  |
| 5 (57.5%–100%)                                            | 1.0381   | 0.4996         | 0.0377  | 0.0261   | 0.2728         | 0.9238  |
| Missing                                                   | -1.6638  | 939.1          | 0.9986  | 15.1652  | 744.1          | 0.9837  |
| Persons per dwelling quintile <sup>d, g</sup>             |          |                |         |          |                |         |
| 1 (0–2.1) (reference)                                     |          |                |         |          |                |         |
| 2 (2.2–2.4)                                               | -0.1597  | 0.3820         | 0.6759  | 0.1985   | 0.1951         | 0.3090  |
| 3 (2.5–2.6)                                               | 0.0802   | 0.4010         | 0.8415  | 0.2449   | 0.2293         | 0.2855  |
| 4 (2.7–3.0)                                               | -0.1603  | 0.3807         | 0.6737  | 0.2926   | 0.2233         | 0.1901  |
| 5 (3.1–5.7)                                               | -0.1696  | 0.4476         | 0.7047  | 0.6269   | 0.2613         | 0.0164  |
| Missing                                                   | -5.0282  | 70.13          | 0.9428  | -10.6735 | 744.1          | 0.9886  |
| Self-identified visible minority quintile <sup>d, h</sup> |          |                |         |          |                |         |
| 1 (0.0%–2.2%) (reference)                                 |          |                |         |          |                |         |
| 2 (2.2%–7.5%)                                             | 0.1566   | 0.5067         | 0.7572  | 0.2509   | 0.1867         | 0.1790  |
| 3 (7.5%–18.7%)                                            | 0.5034   | 0.5074         | 0.3212  | 0.1072   | 0.2139         | 0.6164  |
| 4 (18.7%–43.5%)                                           | 1.1307   | 0.5212         | 0.0300  | -0.1816  | 0.2497         | 0.4670  |
| 5 (43.5%–100%)                                            | 1.1205   | 0.5994         | 0.0616  | -0.3914  | 0.3134         | 0.2116  |
| Missing                                                   | 0.5230   | 940.0          | 0.9996  | -22.4921 | 891.7          | 0.9799  |
| Week of test                                              |          |                |         |          |                |         |
| 6 Dec 2021 to 12 Dec 2021 (ref.)                          |          |                |         |          |                |         |
| 13 Dec 2021 to 19 Dec 2021                                | 1.3092   | 0.4268         | 0.0022  | -0.1928  | 0.1427         | 0.1766  |
| 20 Dec 2021 to 26 Dec 2021                                | 2.0724   | 0.4105         | <.0001  | -0.8025  | 0.1694         | <.0001  |
| Prior positive SARS-CoV-2 test                            |          |                |         |          |                |         |
| No (reference)                                            |          |                |         |          |                |         |
| Yes                                                       | -0.7232  | 0.7321         | 0.3232  | -1.6040  | 0.7243         | 0.0268  |

**eTable 4.** Number of Omicron and Delta severe outcomes (hospitalization or death) by laboratory testing categorization during the period December 6 to 26, 2021

| <b>Classification criteria</b>                                                                    | <b>6 Dec to 12 Dec 2021</b> | <b>13 Dec to 19 Dec 2021</b> | <b>20 Dec to 26 Dec 2021</b> |
|---------------------------------------------------------------------------------------------------|-----------------------------|------------------------------|------------------------------|
| Omicron confirmed via WGS or SGTF                                                                 | 7                           | 28                           | 53                           |
| Omicron classified if collection date $\geq$ 21 December 2021 and no or inconclusive SGTF results | n/a                         | n/a                          | 177                          |
| Delta confirmed via WGS or SGTF                                                                   | 121                         | 115                          | 61                           |
| No classification (excluded)                                                                      | 62                          | 65                           | 15                           |

WGS: whole genome sequencing; SGTF: S-gene target failure

**eTable 5.** Estimates of vaccine effectiveness\* against severe outcomes (hospitalization or death) during the period December 6 to 26, 2021, using the less specific definition of Omicron and Delta

| Outcome         | Doses         | Vaccine products | Days since latest dose | Vaccine effectiveness against Omicron (95% CI) |
|-----------------|---------------|------------------|------------------------|------------------------------------------------|
| Severe outcomes | First 2 doses | ≥1 mRNA vaccine  | 7-59                   | 89 (64, 97)                                    |
|                 |               |                  | 60-119                 | 85 (69, 92)                                    |
|                 |               |                  | 120-179                | 92 (89, 95)                                    |
|                 |               |                  | 180-239                | 93 (89, 95)                                    |
|                 |               |                  | ≥240                   | 93 (77, 98)                                    |
|                 |               |                  | Third dose             | Any mRNA vaccine                               |
|                 |               | BNT162b2         | ≥7                     | 98 (97, 99)                                    |
|                 |               |                  | 0-6                    | 95 (91, 97)                                    |
|                 |               |                  | ≥7                     | 98 (97, 99)                                    |
|                 |               |                  | 0-6                    | 91 (81, 96)                                    |
|                 |               |                  | ≥7                     | 98 (96, 99)                                    |
|                 |               |                  | mRNA-1273              | 0-6                                            |
|                 |               | ≥7               | 98 (96, 99)            |                                                |

\*Vaccine effectiveness estimates adjusted for: age (in 10-year age bands), sex, public health unit region of residence, number of SARS-CoV-2 PCR tests during the 3 months prior to December 14, 2020, past SARS-CoV-2 infection >90 days prior to index date, comorbidities, influenza vaccination status during the 2019/2020 and/or 2020/2021 influenza seasons, and neighbourhood-level information on median household income, proportion of the working population employed as non-health essential workers, mean number of persons per dwelling, and proportion of the population who self-identify as a visible minority.
